# Supplementary material for: Capsulation of EBTAC into ZIF-8 for the development of a signal-on fluorescent biosensor to detect alkaline phosphatase
Source: Royal Society of Chemistry journal article supplement (doi:10.1039/d3ay01558k), 2023-01-01
Supplement: d3ay01558k1.pdf [file d3ay01558k1.pdf]

## Electronic Supplementary Information

### **Capsulation of EBTAC into ZIF-8 for the development of a signal-on fluorescent biosensor to detect alkaline phosphatase**

Shanshan Liu<sup>a</sup>, Nian Wang<sup>a</sup>, Li Li<sup>a,\*</sup>, Yi Liu<sup>b,c,\*</sup>

<sup>a</sup>Hubei Key Laboratory of Processing and Application of Catalytic Materials, College of Chemistry and Chemical Engineering, Huanggang Normal University, Huanggang 438000, P. R. China

<sup>b</sup>School of Chemical and Environmental Engineering, Wuhan Polytechnic University, Wuhan 430023, P. R. China

<sup>c</sup>Hubei Key Laboratory of Radiation Chemistry and Functional Materials, Hubei University of Science and Technology, Xianning 437100, P. R. China.

E-mail: 599255968@qq.com; yiliu@whu.edu.cn;

# Contents

|                 |      |
|-----------------|------|
| Fig. S1.....    | S-3  |
| Fig. S2.....    | S-4  |
| Fig. S3.....    | S-5  |
| Fig. S4.....    | S-6  |
| Fig. S5.....    | S-7  |
| Fig. S6.....    | S-8  |
| Fig. S7.....    | S-9  |
| Fig. S8.....    | S-10 |
| Fig. S9.....    | S-11 |
| Fig. S10.....   | S-12 |
| Fig. S11.....   | S-13 |
| Fig. S12.....   | S-14 |
| Table. S1.....  | S-15 |
| Table. S2.....  | S-16 |
| References..... | S-17 |

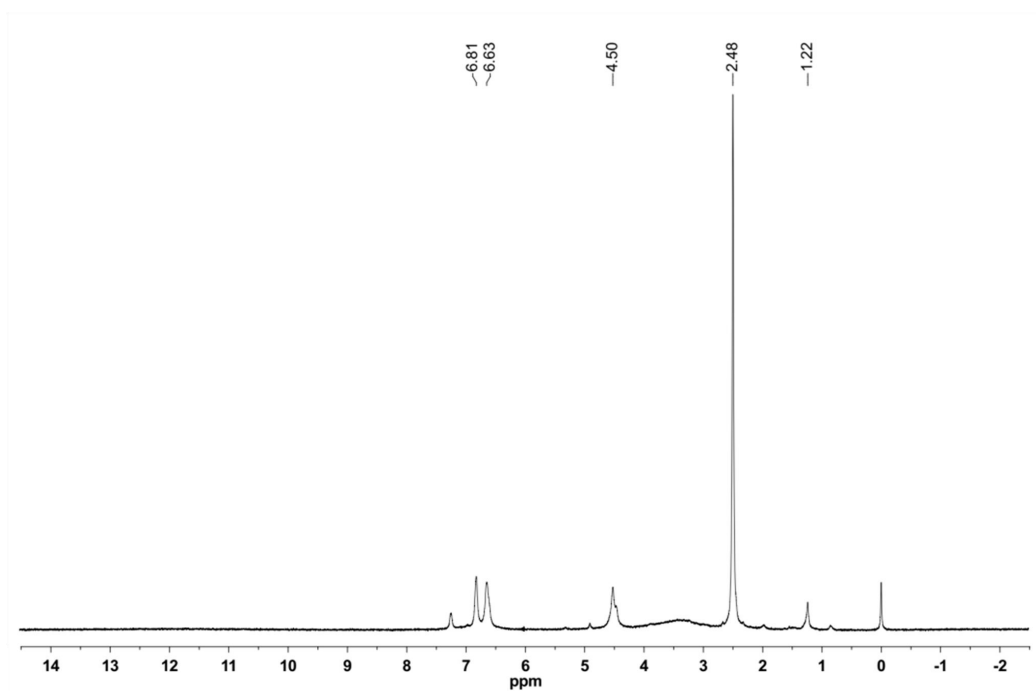

**Fig. S1**  $^1\text{H}$  NMR (Bruker Avance III 400 MHz,  $\text{DMSO-}d_6$ ) of EBTAC:  $\delta$  6.3 (4H,  $\text{CH}_{\text{py}}$ ), 6.81 (4H,  $\text{CH}_{\text{py}}$ ), 4.50 (s, 8H,  $\text{CH}_2$ ).

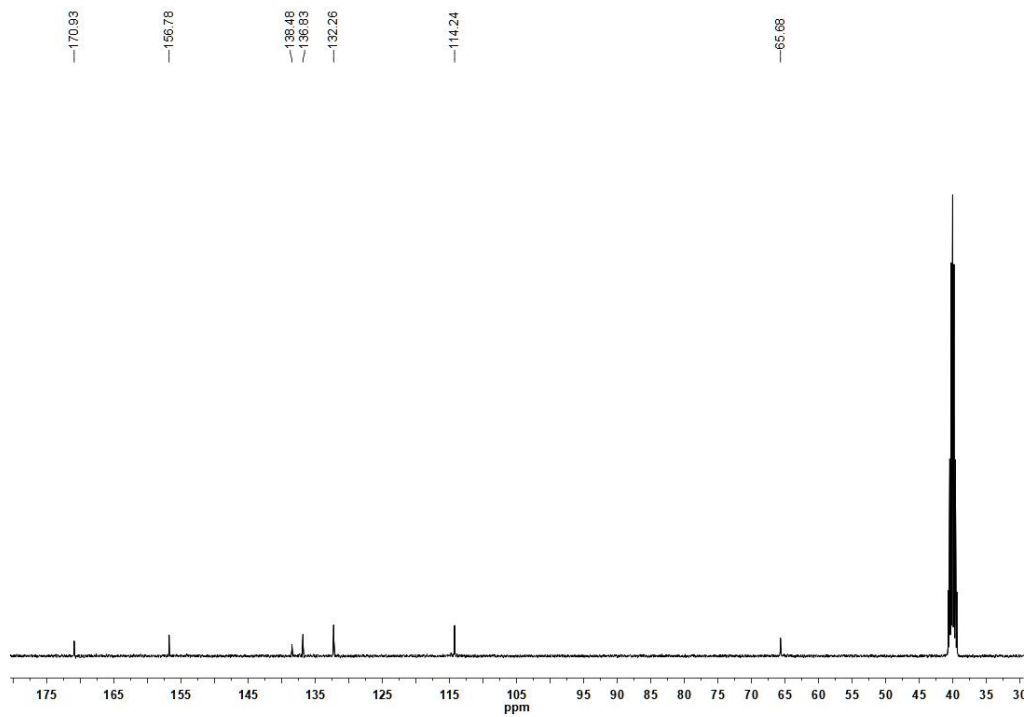

**Fig. S2**  $^{13}\text{C}$  NMR (Bruker Avance III 400 MHz,  $\text{DMSO-}d_6$ ) of EBTAC:  $\delta$  170.9 (C=O), 156.8 ( $\text{C}_{\text{py}}$ ), 138.5 (C=C), 136.8 ( $\text{C}_{\text{py}}$ ), 132.3 ( $\text{C}_{\text{py}}$ ), 114.2 ( $\text{C}_{\text{py}}$ ), 63.7 ( $\text{CH}_2$ ).

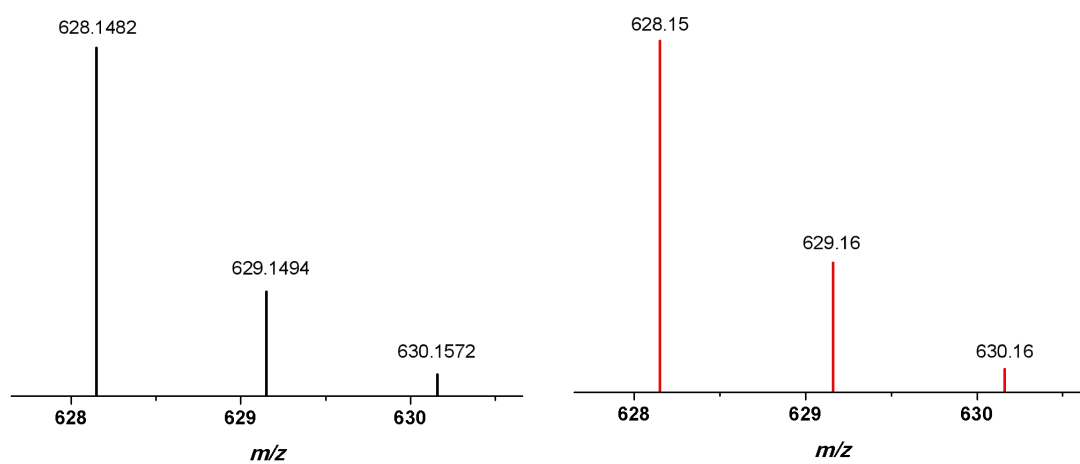

**Fig. S3** The peak at  $m/z = 628.16$  is ascribed to Chemical Formula:  $C_{34}H_{28}O_{12}$ ,  $m/z$ : 628.16 (100.0%), 629.16 (36.8%), 630.16 (6.6%), 630.16 (2.5%) according to the analysis by ChemBioDraw). the simulated result fits well with the measured isotopic distribution pattern.

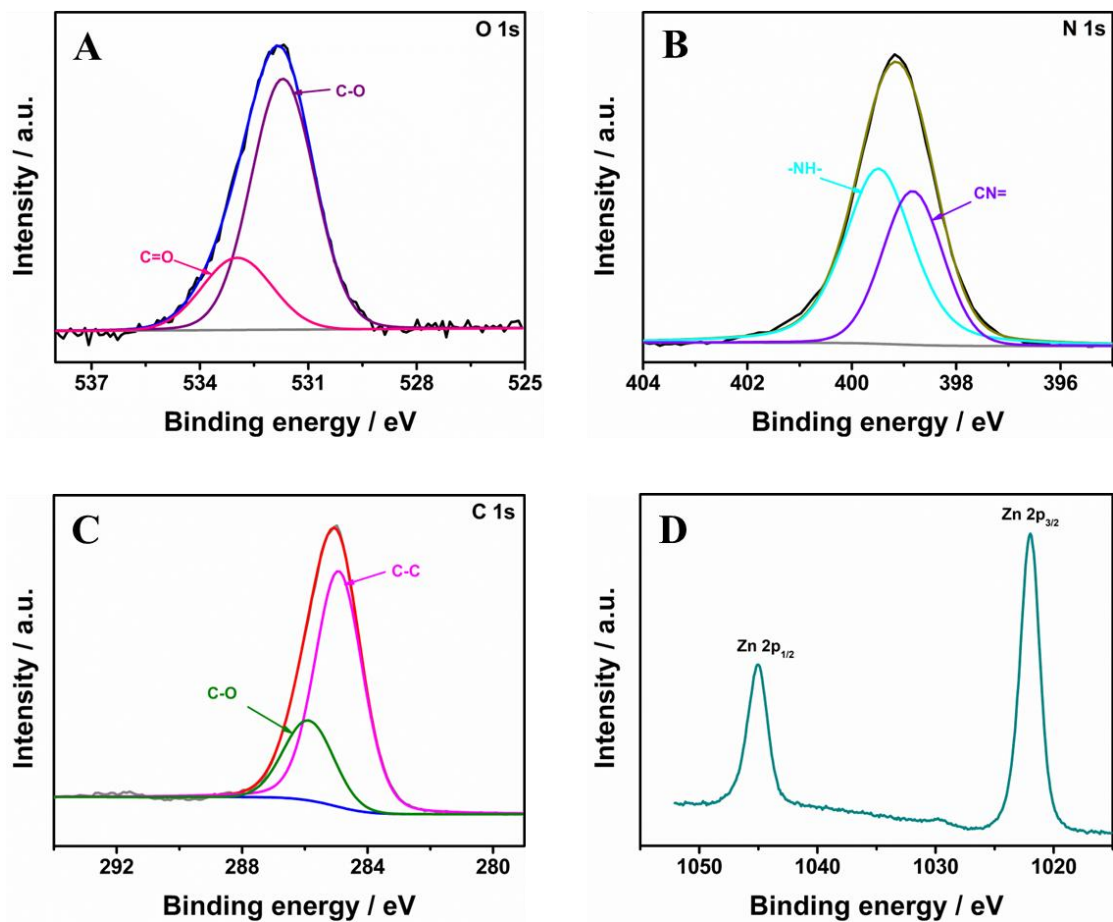

**Fig. S4** The XPS spectra for O 1s, N 1s, C 1s and Zn 2p, respectively.

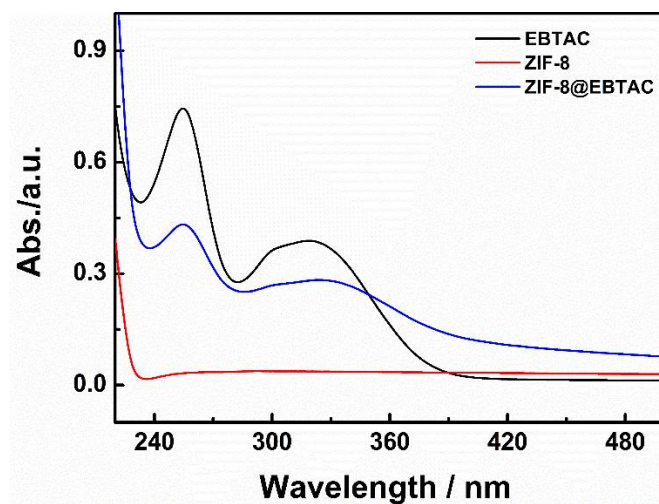

**Fig. S5** Ultraviolet-visible absorption spectra of ZIF-8, EBTAC and ZIF-8@EBTAC.

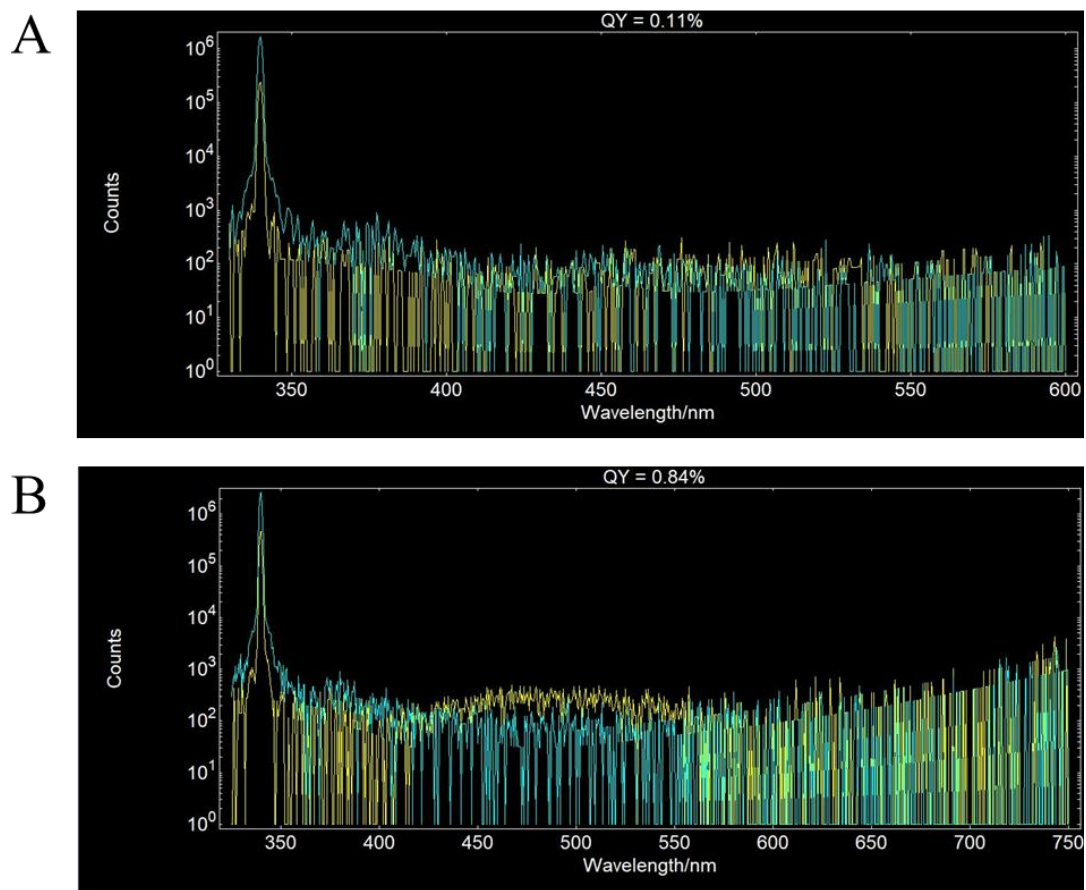

**Fig. S6** The fluorescence quantum yield of EBTAC (A) and ZIF-8@EBTAC (B).



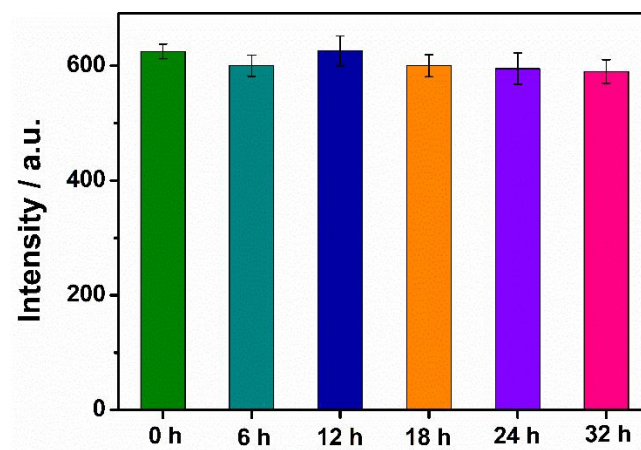

**Fig. S7** Fluorescence intensity of ZIF-8@EBTAC with increasing storage time.

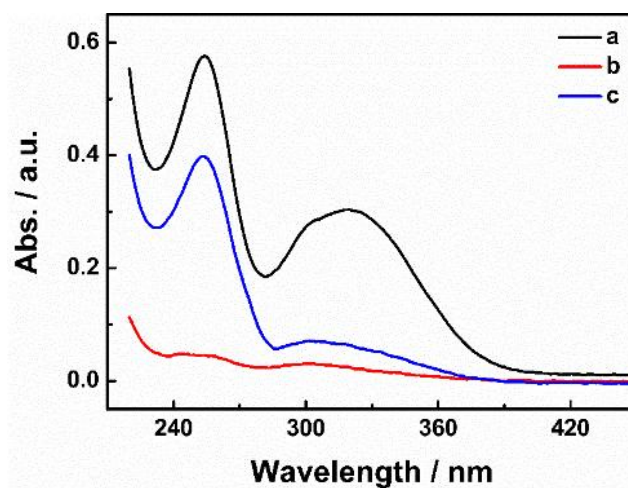

**Fig. S8** UV-vis absorption spectra of sole EBTAC (a), the supernatant of ZIF-8@EBTAC in the absence (b) and presence of ppi (100  $\mu$ M) (c).

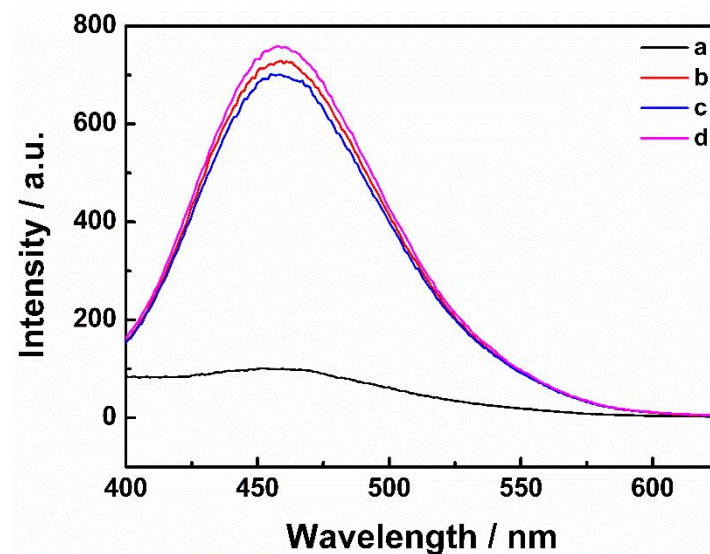

**Fig. S9** Fluorescence response of ZIF-8@EBTAC in the presence of ppi (a),  $\text{H}_2\text{PO}_4^-$  (b),  $\text{HPO}_4^{2-}$  (c) and ppi (d).

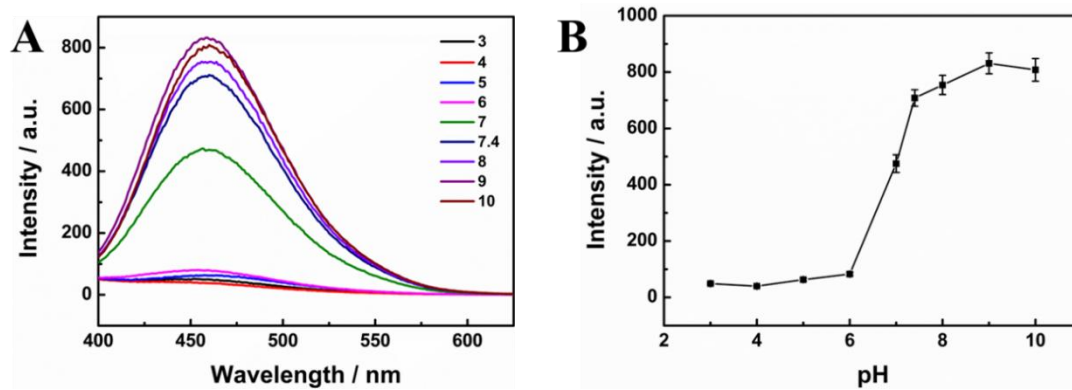

**Fig. S10** Fluorescence response of ZIF-8@EBTAC versus different pH values of HEPES buffer.

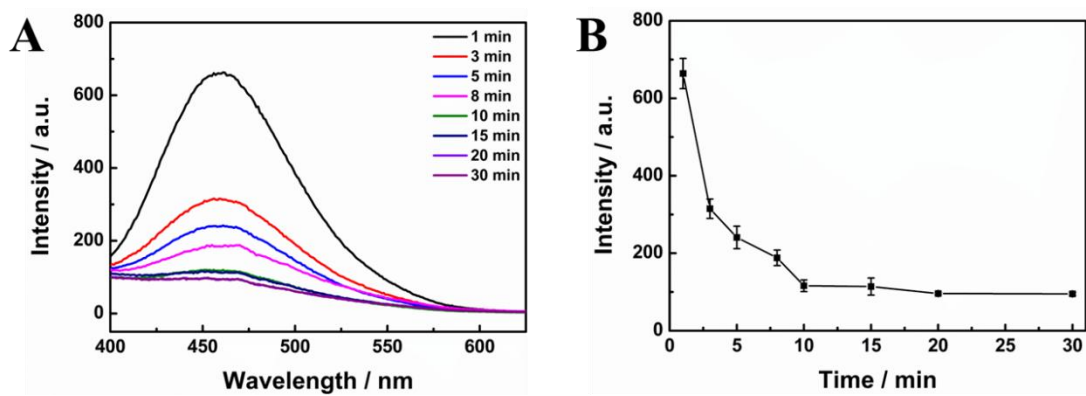

**Fig. S11** Effects of the incubation time of ALP with ppi on the fluorescence response of ZIF-8@EBTAC.

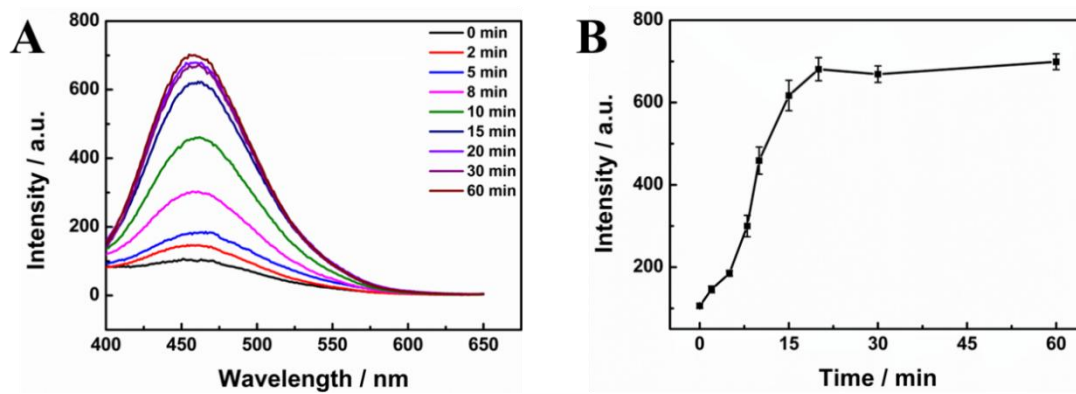

**Fig. S12** Effects of the catalyze time of ALP with ppi on the fluorescence response of ZIF-8@EBTAC.

**Table S1.** Performance comparison of the proposed assay with previously reported systems for the detection of ALP.

| Method                            | Linear range (U/L) | Detection limit (U/L) | Reference |
|-----------------------------------|--------------------|-----------------------|-----------|
| Fluorescence                      | 0.06–600           | 0.035                 | S 1       |
| Surface-enhanced Raman scattering | 1–300              | 0.38                  | S 2       |
| Electrochemical                   | 1.25–100           | 0.366                 | S 3       |
| Photoelectrochemical              | 50–1000            | 42.1                  | S 4       |
| Colorimetric                      | 20–800             | 3.0                   | S 5       |
| Fluorescence                      | 0.01–100           | 0.01                  | This Work |

**Table S2.** Detection of ALP activity in serum samples.

| Sample | Added ALP<br>(U/L) | Detected ALP<br>(U/L) | Recovery<br>(%) |
|--------|--------------------|-----------------------|-----------------|
| 1      | 0                  | 0.1                   | /               |
| 2      | 10                 | 9.10                  | 91.0            |
| 3      | 50                 | 47.9                  | 95.8            |
| 4      | 100                | 96.1                  | 96.1            |



## References

- S1. S. S. Ding, M. X. Li, Y. Xiang, J. Tang, Q. Zhang, M. Huang, X. H. Zhao, J. Wang, and C. M. Li, Synergistic effect-mediated fluorescence switching of nitrogen-doped carbon dots for visual detection of alkaline phosphatase, *Microchem. J.*, 2022, **181**, 107651.
- S2. C. Y. Xi, M. Zhang, L. Jiang, H.-Y. Chen, J. Lv, Y. He, M. E. Hafez, R.-C. Qian, and D.-W. Li, MOFs-functionalized regenerable SERS sensor based on electrochemistry for pretreatment-free detection of serum alkaline phosphatase activity, *Sensor. Actuat. B-chem.*, 2022, **369**, 132264.
- S3. H. H. Rao, J. Y. Li, M. Y. Luo, K. H. Zhang, H. Gou, H. X. Liu, and Z. H. Xue, A label-free and modification-free ratiometric electrochemical strategy for enhanced natural enzyme detection using a bare electrode and nanozymes system, *Anal. Bioanal. Chem.*, 2022, **414**, 2991-3003.
- S4. L. Deng, F. H. Ma, M. H. Yang, X. Q. Li, and X. Chen, A halide perovskite/lead sulfide heterostructure with enhanced photoelectrochemical performance for the sensing of alkaline phosphatase (ALP), *Chem. Commun.*, 2023, **59**, 1361.
- S5. Z. Y. Ding, Z. Li, X. X. Zhao, Y. R. Miao, Z. F. Yuan, Y. Y. Jiang, and Y. Z. Lu, Self-deposited ultrasmall Ru nanoparticles on carbon nitride with high peroxidase-mimicking activity for the colorimetric detection of alkaline phosphatase, *J. Colloid Interf. Sci.*, 2023, **631**, 86-95.
